# Supplementary material for: Role of the protease-activated receptor-2 (PAR2) in the exacerbation of house dust mite-induced murine allergic lung disease by multi-walled carbon nanotubes
Source: PubMed Central journal article supplement (PMC10424461; doi:10.1186/s12989-023-00538-6), 2023-08-14
Supplement: 12989_2023_538_MOESM1_ESM.pdf [file 12989_2023_538_MOESM1_ESM.pdf]

## Additional File 1

**Table S1.** Selected physicochemical characterization of NC7000 MWCNTs<sup>1</sup>.

|                              |                           |
|------------------------------|---------------------------|
|                              |                           |
| <b>Amorphous Carbon</b>      | 4.68%                     |
| <b>Carbon<sup>2</sup></b>    | 92.05% (EDX); 97.8% (XPS) |
| <b>Oxygen</b>                | 3.19% (EDX); 1.4 (XPS)    |
| <b>Trace metals (ICP-MS)</b> |                           |
| Al                           | 4.43%                     |
| TE <sup>3</sup>              | 0.54%                     |
| <b>Avg. Diameter (TEM)</b>   | 12 nm                     |
| <b>Length (TEM, SEM)</b>     | 1,350 nm                  |
| <b>BET Surface Area</b>      | 24 m <sup>2</sup> /g      |
| <b>Pore volume</b>           | 61 $\mu$ l/g              |

<sup>1</sup>Data from: Taylor-Just et al., 2020.

<sup>2</sup>Carbon measured by EDX (energy dispersive X-ray analysis) or XPS (X-ray Photoelectron spectroscopy).

<sup>3</sup>TE = transition elements (Co and Fe)
