# Supplementary material for: Role of the protease-activated receptor-2 (PAR2) in the exacerbation of house dust mite-induced murine allergic lung disease by multi-walled carbon nanotubes
Source: PubMed Central journal article supplement (PMC10424461; doi:10.1186/s12989-023-00538-6), 2023-08-14
Supplement: 12989_2023_538_MOESM2_ESM.pdf [file 12989_2023_538_MOESM2_ESM.pdf]

Additional File 2

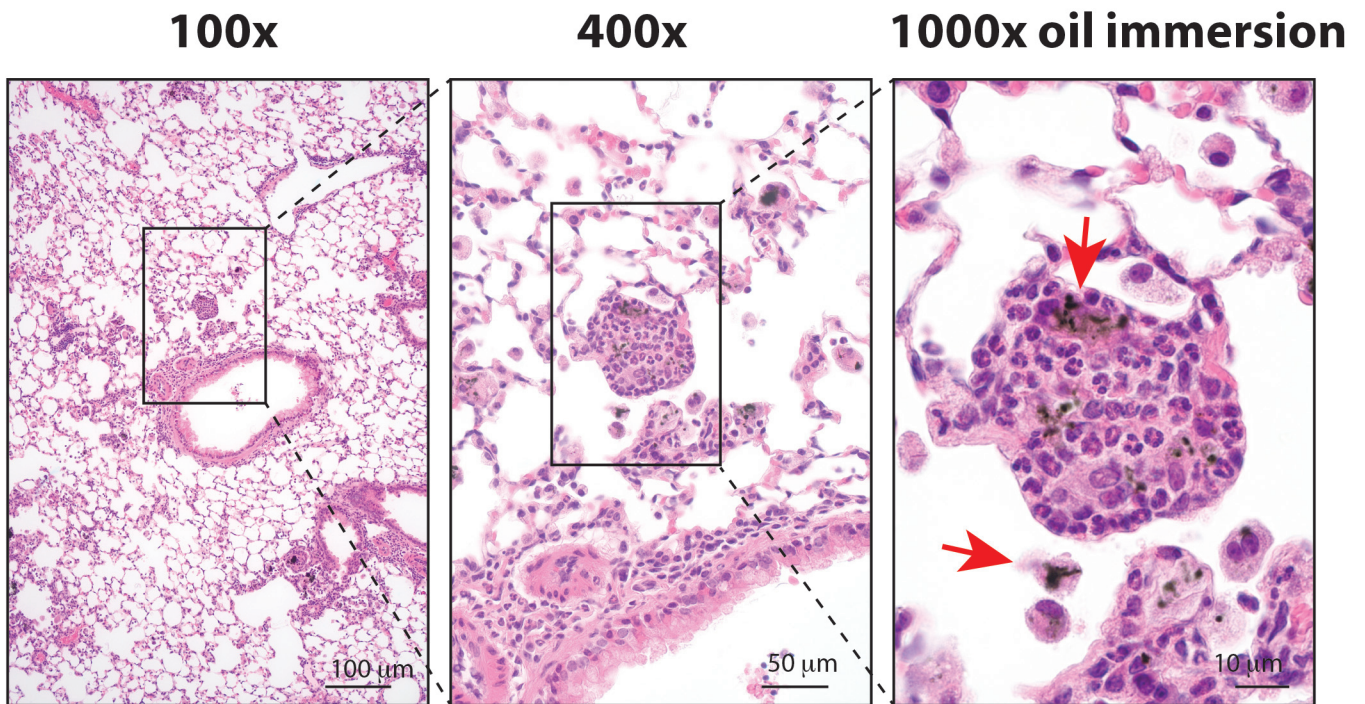

**Fig. S1.** Hematoxylin and eosin-stained lung tissue section showing eosinophilic granulomatous lesions containing MWCNTs in wild type mouse lung following exposure to HDM extract and MWCNTs by oropharyngeal aspiration. Red arrows indicate MWCNTs.
