# Supplementary material for: Role of the protease-activated receptor-2 (PAR2) in the exacerbation of house dust mite-induced murine allergic lung disease by multi-walled carbon nanotubes
Source: PubMed Central journal article supplement (PMC10424461; doi:10.1186/s12989-023-00538-6), 2023-08-14
Supplement: 12989_2023_538_MOESM3_ESM.pdf [file 12989_2023_538_MOESM3_ESM.pdf]

### Additional File 3

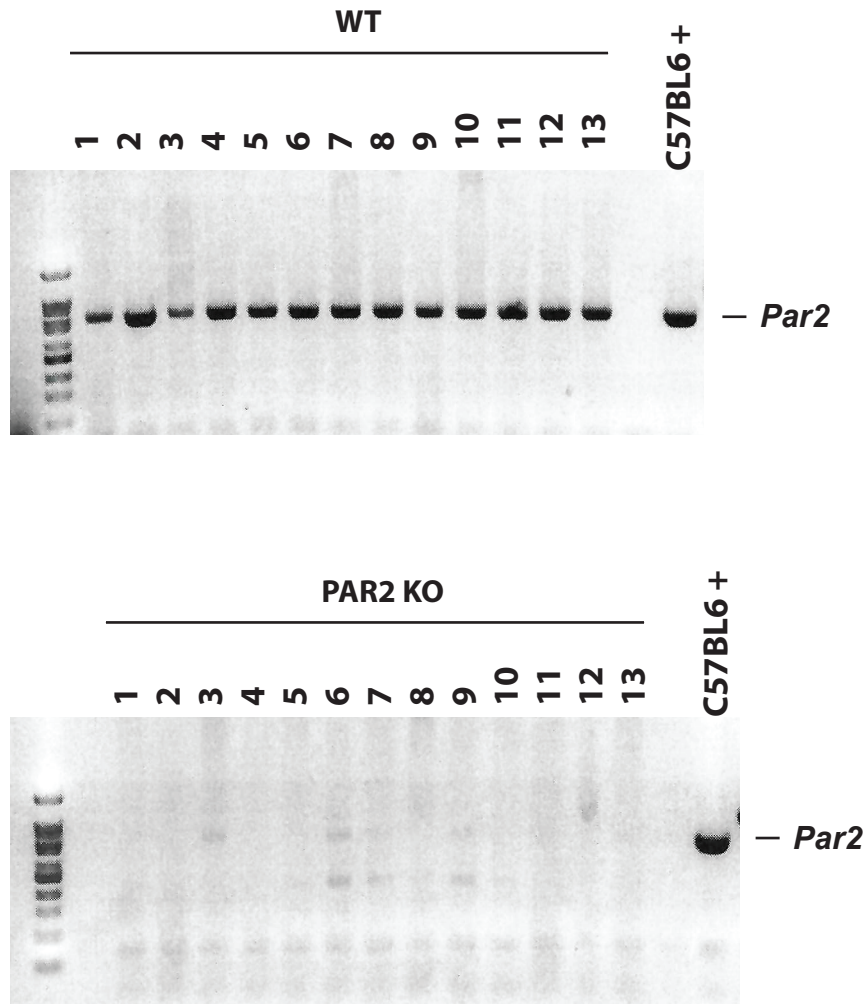

**Fig. S2.** Example of genotyping results of wild type (WT) and par2 KO mice used in this study. DNA from C57BL6 mice were used as a positive control.
