# Supplementary material for: Role of the protease-activated receptor-2 (PAR2) in the exacerbation of house dust mite-induced murine allergic lung disease by multi-walled carbon nanotubes
Source: PubMed Central journal article supplement (PMC10424461; doi:10.1186/s12989-023-00538-6), 2023-08-14
Supplement: 12989_2023_538_MOESM4_ESM.pdf [file 12989_2023_538_MOESM4_ESM.pdf]

Additional File 4

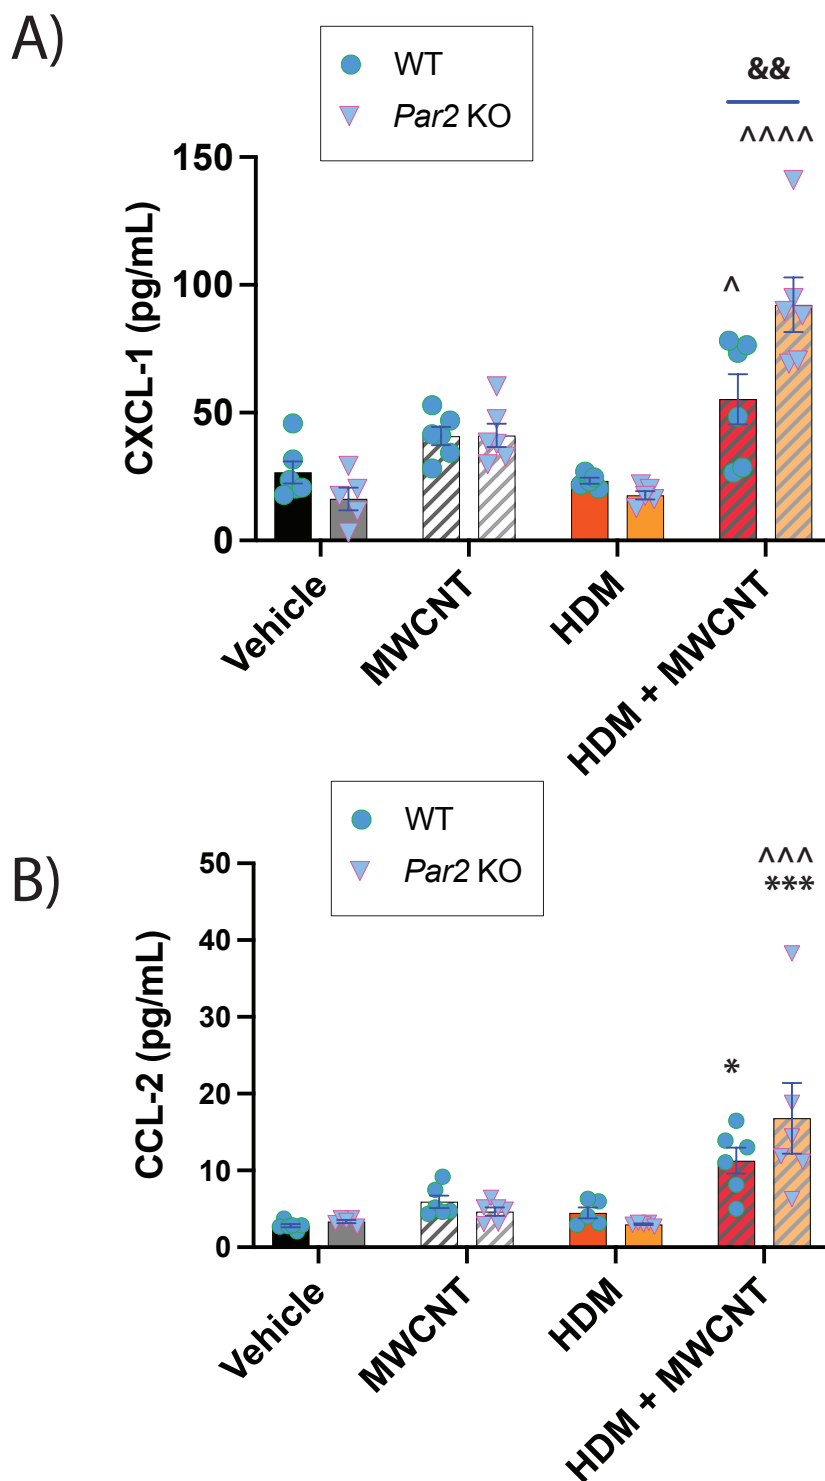

**Fig. S3.** Protein levels of CXCL-1 (A) and CCL-2 (B) in BALF from WT and *par2* KO mice. \* $p < 0.05$  compared to vehicle, \*\*\* $p < 0.001$  compared to vehicle, ^ $p < 0.05$  compared to HDM, ^^^ $p < 0.001$  compared to HDM, && $p < 0.01$  between genotypes.
