# Supplementary material for: Role of the protease-activated receptor-2 (PAR2) in the exacerbation of house dust mite-induced murine allergic lung disease by multi-walled carbon nanotubes
Source: PubMed Central journal article supplement (PMC10424461; doi:10.1186/s12989-023-00538-6), 2023-08-14
Supplement: 12989_2023_538_MOESM5_ESM.pdf [file 12989_2023_538_MOESM5_ESM.pdf]

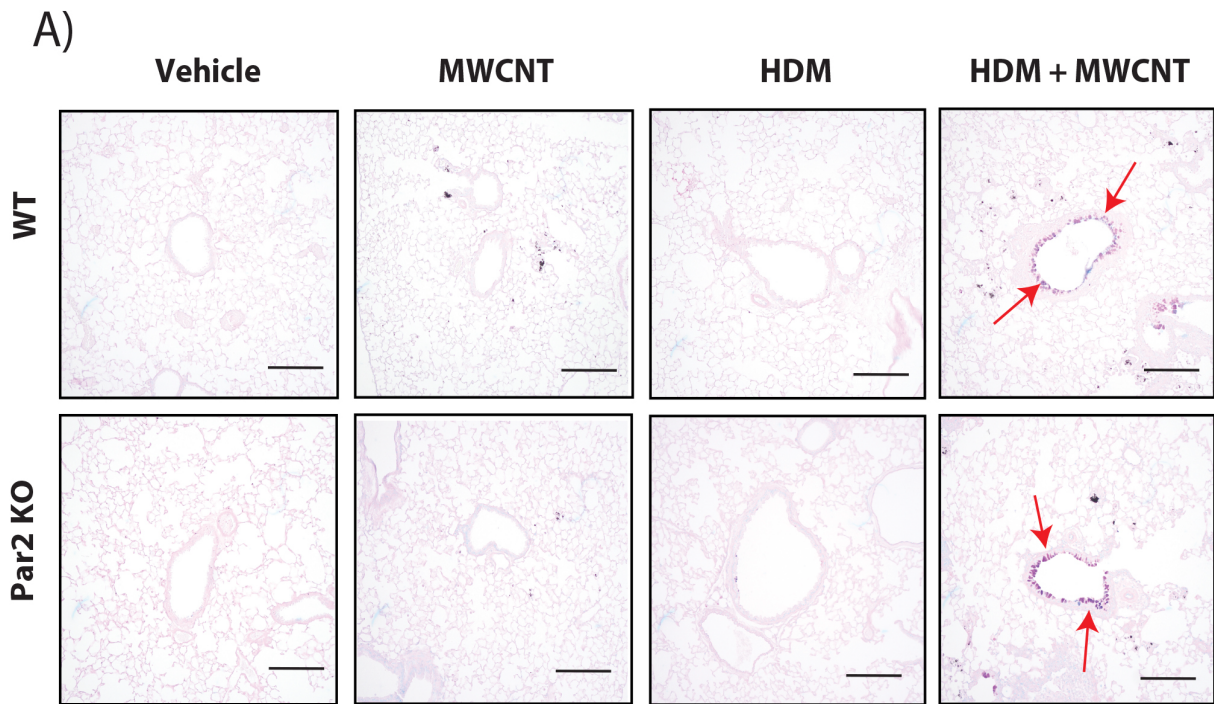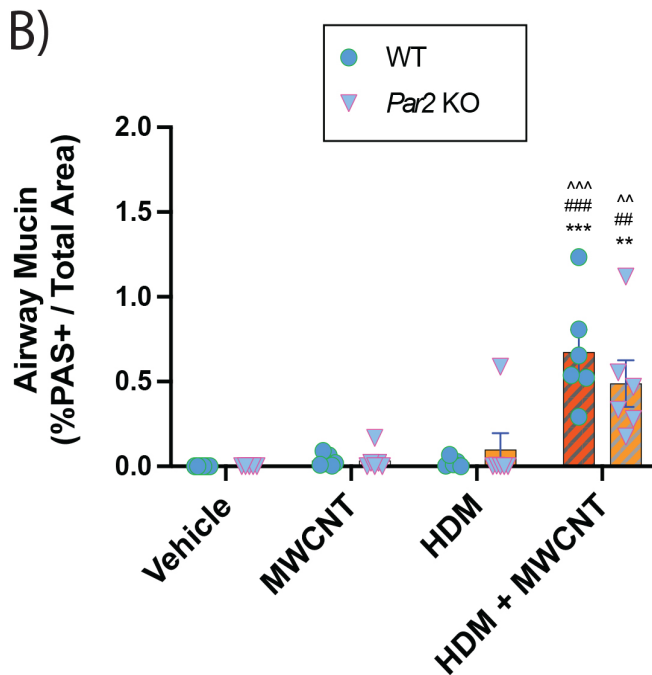

**Fig. S4.** Panel A: Alcian blue PAS staining of lung tissue from WT and Par2 KO mice showing mucous cell metaplasia after exposure to HDM extract and MWCNTs in both genotypes. Red arrows indicate mucous cell metaplasia. Magnification bars = 100  $\mu$ m. Panel B: Quantitative morphometry of airway mucin in WT and Par2 KO mice.
