# Supplementary material for: Role of the protease-activated receptor-2 (PAR2) in the exacerbation of house dust mite-induced murine allergic lung disease by multi-walled carbon nanotubes
Source: PubMed Central journal article supplement (PMC10424461; doi:10.1186/s12989-023-00538-6), 2023-08-14
Supplement: 12989_2023_538_MOESM6_ESM.pdf [file 12989_2023_538_MOESM6_ESM.pdf]

Additional File 6

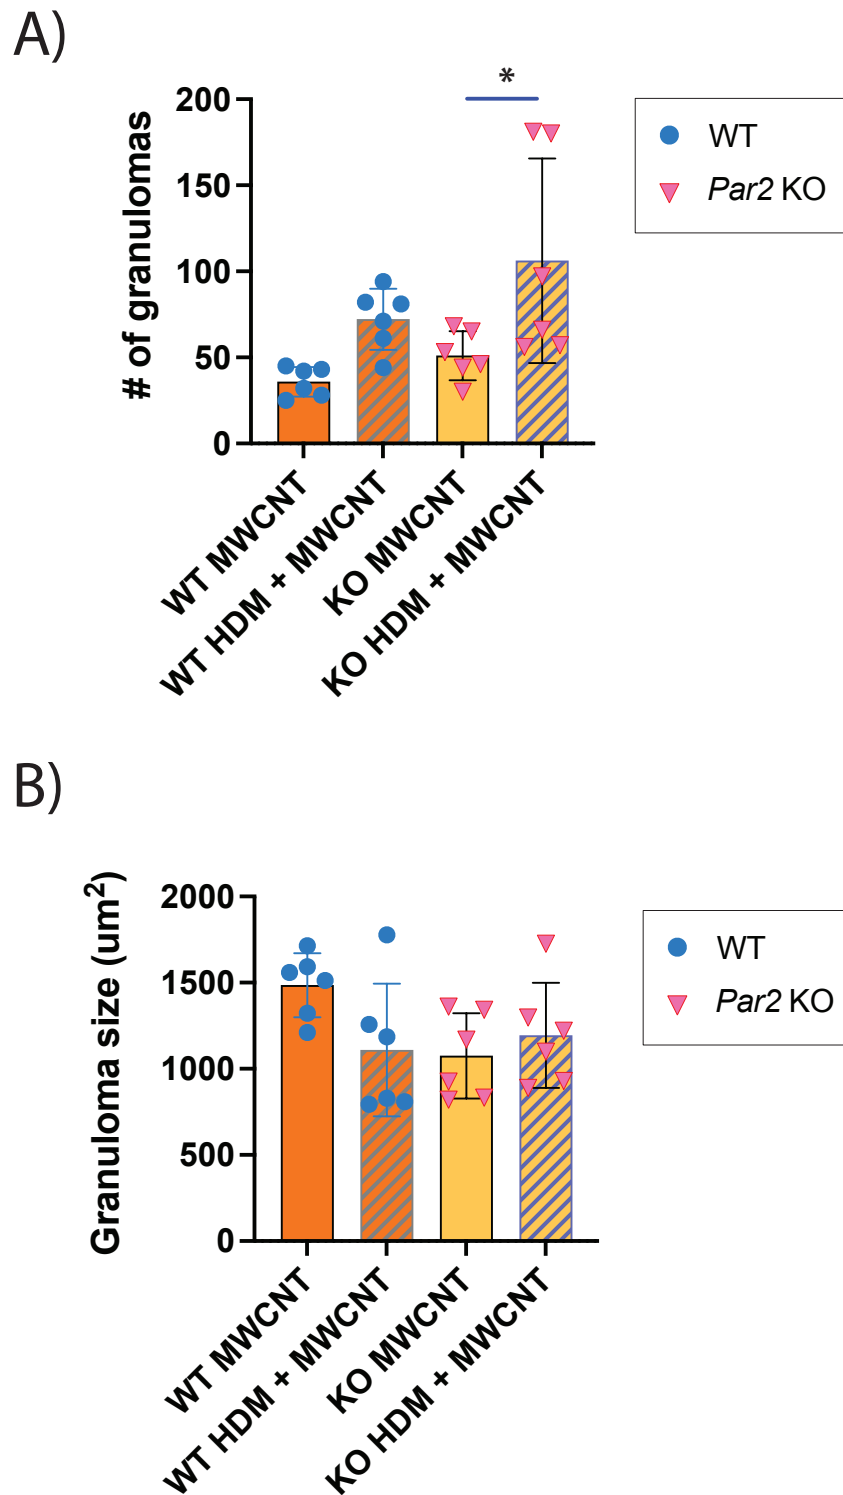

**Fig. S5.** Quantitative morphometry of eosinophilic granulomas containing MWCNT in wild type and *Par2* KO mice. (A) Numbers of granulomas per lung section. \* $p < 0.05$  compared to MWCNT alone. (B) Average size of granulomas.
