# Supplementary material for: Role of the protease-activated receptor-2 (PAR2) in the exacerbation of house dust mite-induced murine allergic lung disease by multi-walled carbon nanotubes
Source: PubMed Central journal article supplement (PMC10424461; doi:10.1186/s12989-023-00538-6), 2023-08-14
Supplement: 12989_2023_538_MOESM7_ESM.pdf [file 12989_2023_538_MOESM7_ESM.pdf]

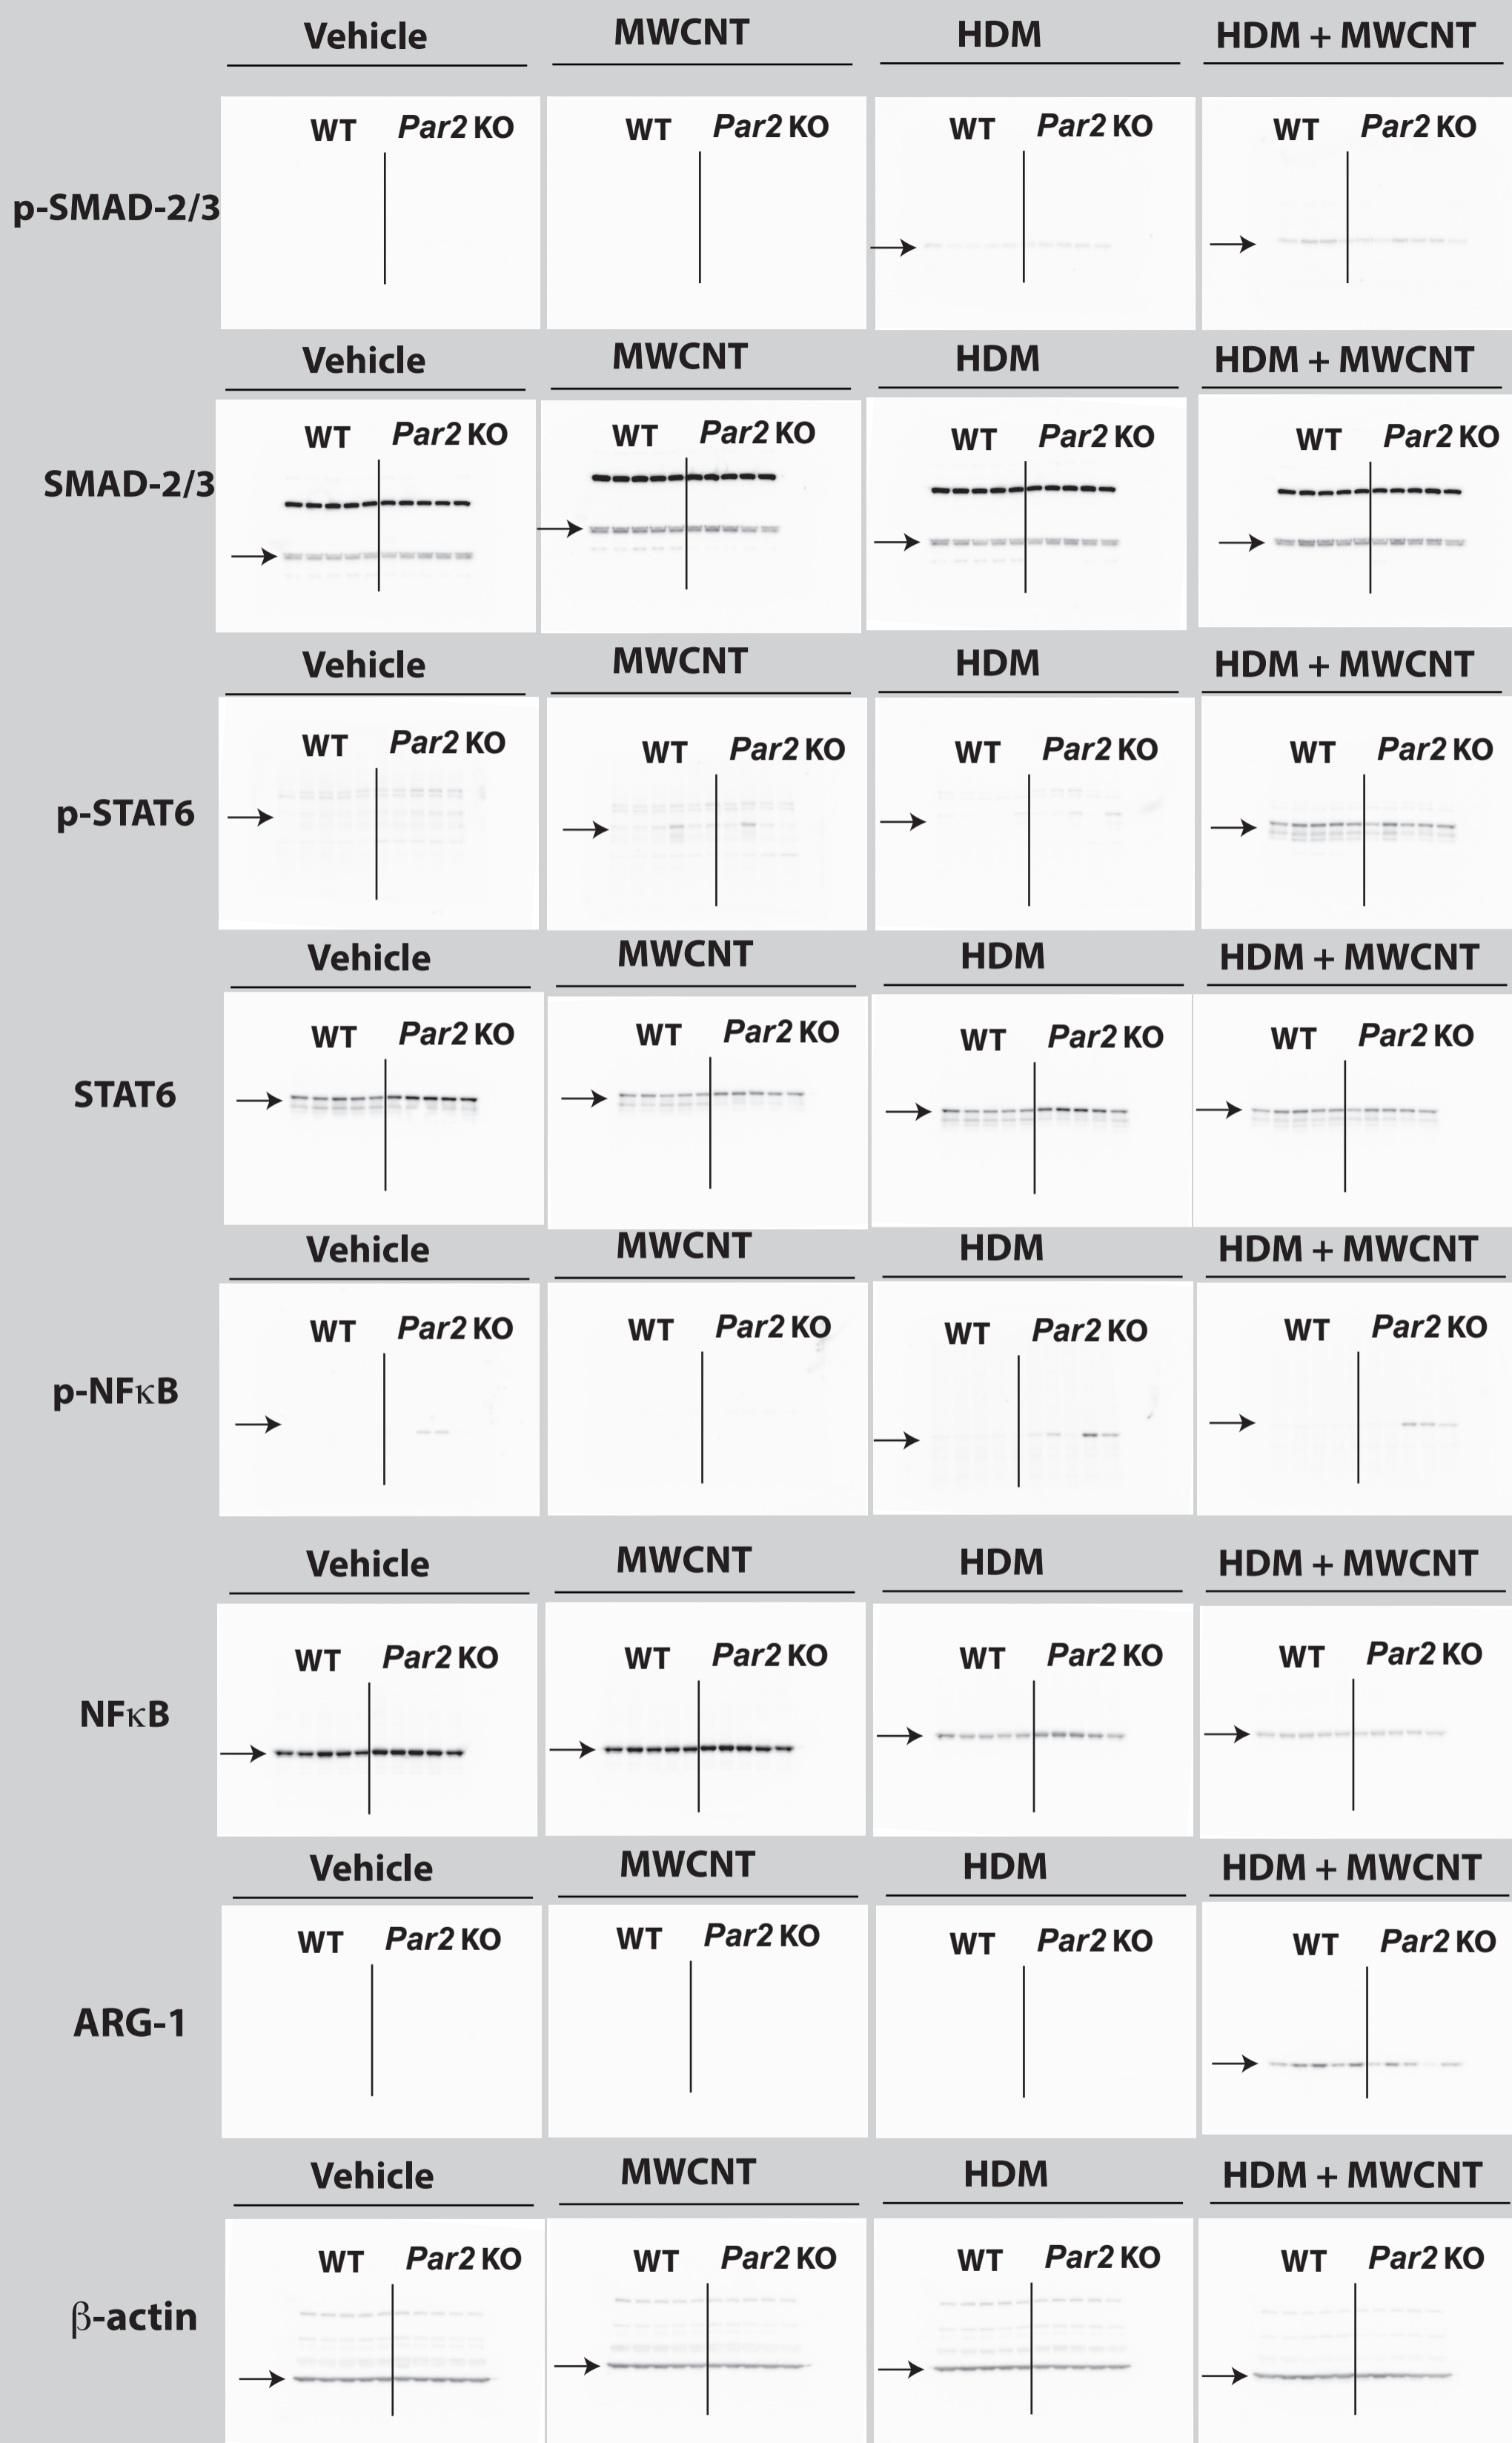

**Fig. S6.** Western blotting results on the lung tissue from wild type (WT) or Par2 KO mice (5 mice per group) for each of the four treatment groups captured using Amersham Imager 680 (see Methods). Arrows indicate the position of each specific protein. Cropped versions of western blots are shown in Fig. 4.
