# Supplementary material for: Role of the protease-activated receptor-2 (PAR2) in the exacerbation of house dust mite-induced murine allergic lung disease by multi-walled carbon nanotubes
Source: PubMed Central journal article supplement (PMC10424461; doi:10.1186/s12989-023-00538-6), 2023-08-14
Supplement: 12989_2023_538_MOESM8_ESM.pdf [file 12989_2023_538_MOESM8_ESM.pdf]

## Additional File 8

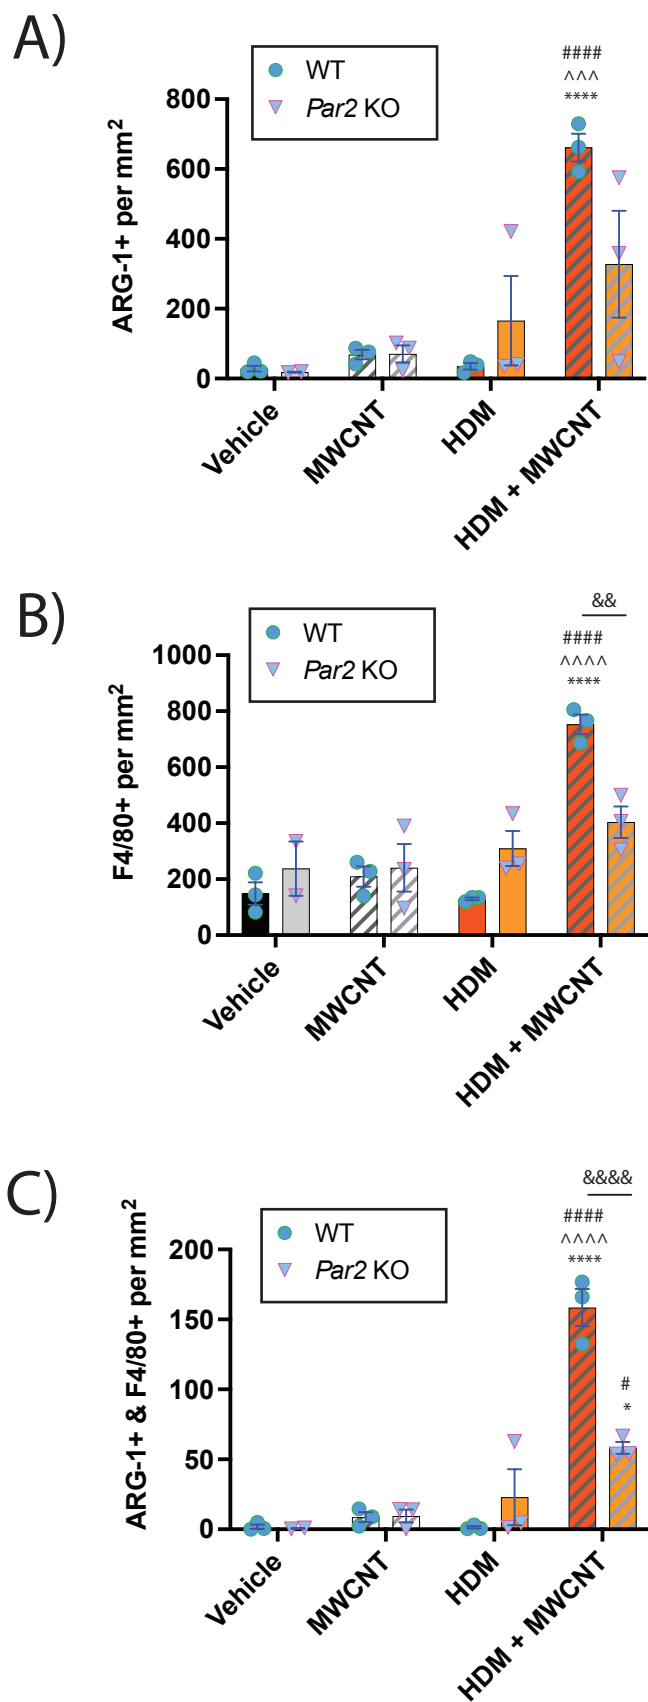

**Fig. S7.** Semi-quantitative analysis of ARG-1 immunohistochemistry derived from QuPath software. **(A)** the number of ARG-1+ cells per mm<sup>2</sup> lung tissue sections per animal. **(B)** Percent of cells that were DAPI+ and ARG-1+, and **(C)** Percent of cells that were ARG-1+ and F4/80+. The data represent 3 animals per group for each genotype.
